1  
2  
3  
4  
5  
6  
7  
8  
9  
10  
11  
12  
13  
14  
15  
16  
17  
18  
19  
20  
21

**A *Caenorhabditis elegans* model of adenylosuccinate lyase deficiency reveals  
neuromuscular and reproductive phenotypes of distinct etiology**

Adam R. Fenton, Haley N. Janowitz, Melanie R. McReynolds, Wenqing Wang<sup>#</sup>, Wendy Hanna-  
Rose\*

Department of Biochemistry and Molecular Biology, The Pennsylvania State University,  
University Park, PA 16802, USA

\*Corresponding Author

E-mail: wxh21@psu.edu (WHR)

<sup>#</sup> Current Address: ABLife Inc., Wuhan, China

Short title: Etiology of ADSL deficiency phenotypes

## 22 **Abstract**

23           Inborn errors of purine metabolism are rare syndromes with an array of complex phenotypes in  
24 humans. One such disorder, adenylosuccinate lyase deficiency (ASLD), is caused by a decrease in the  
25 activity of the bi-functional purine biosynthetic enzyme, adenylosuccinate lyase (ADSL). Mutations in  
26 human ADSL cause epilepsy, muscle ataxia, and autistic-like symptoms. Although the genetic basis of  
27 ASLD syndrome is known, the molecular mechanisms driving phenotypic outcome are not. Here, we  
28 characterize neuromuscular and reproductive phenotypes associated with a deficiency of *adsl-1* in  
29 *Caenorhabditis elegans*. Characterization of the neuromuscular phenotype reveals a disruption of  
30 cholinergic transmission affecting muscular contraction. Using genetics, pharmacological  
31 supplementation, and metabolite measurements, we correlate phenotypes with distinct metabolic  
32 perturbations. The neuromuscular defect is associated with a toxic accumulation of a purine biosynthetic  
33 intermediate whereas the reproductive defect can be ameliorated by purine supplementation, indicating  
34 differing molecular mechanisms behind the phenotypes of ASLD. Because purine metabolism is highly  
35 conserved in metazoans, we suggest that similar separable metabolic perturbations result in the varied  
36 symptoms in the human disorder and that a dual-approach therapeutic strategy may be beneficial.

37

38 **Keywords:** *adsl-1*, *C. elegans*, purine metabolism, locomotion, reproduction

39

40

## 41 **Author summary**

42           Adenylosuccinate lyase deficiency is a rare metabolic disorder that is associated with epilepsy,  
43 muscle ataxia, and autistic-like symptoms in humans. This disorder arises from mutations in  
44 adenylosuccinate lyase, an enzyme involved in purine nucleotide biosynthesis. While we understand the  
45 genetic basis of this disorder, the mechanism of pathogenesis is unknown. Moreover, the linkage between  
46 phenotype and metabolic perturbation remains unclear. We report here on neuromuscular and  
47 reproductive phenotypes caused by a deficiency of *adsl-1* in *Caenorhabditis elegans*. For each defect, we  
48 identified a specific metabolic perturbation that causes the phenotype. The neuromuscular phenotype is  
49 associated with a toxic accumulation of a purine metabolic intermediate whereas the reproductive  
50 phenotype can be alleviated by purine supplementation. Our results point to separate molecular  
51 mechanisms as causative for the phenotypes, suggesting that there may be a similar relationship between  
52 phenotype and metabolic perturbation in humans. As such, our model suggests the use of a multi-pronged  
53 approach in humans to therapeutically target the metabolic perturbation contributing to each symptom.

54

55

## 56 **Introduction**

57           Inborn errors of purine metabolism are understudied syndromes that arise from mutation of  
58 purine biosynthetic or catabolic enzymes. Although rare, these disorders are thought to be underdiagnosed  
59 because the varied clinical symptoms mimic other disorders (1). Purine disorders can have devastating  
60 health effects and often result in early death. Not only are there few therapeutic options available to  
61 patients, but the intriguing biological mechanisms linking defects in purine biosynthesis to phenotypic  
62 outcomes have also been difficult to decipher. Our aim is to use a fast, inexpensive and yet applicable  
63 model to explore the molecular links between perturbations in purine biosynthesis and organismal  
64 physiological and behavioral outcomes and to generate therapeutic strategies for these rare and  
65 understudied syndromes.

66           Purine nucleotides are monomers that polymerize with pyrimidine nucleotides to form nucleic  
67 acids. They also serve critical roles in cell signaling, energy storage and transfer, and metabolic regulation  
68 (2). Purines are synthesized via two biosynthetic pathways: *de novo* and salvage. *De novo* purine  
69 biosynthesis forms purine monomers from the components of intracellular amino acids and sugars. This  
70 pathway takes eleven steps to convert ribose-5-phosphate (R5P) to inosine monophosphate (IMP), the  
71 precursor for other purine monomers (Fig 1). The salvage biosynthetic pathway uses nucleic acid  
72 constituents from the diet or purine catabolism to create new purine products.

73           Adenylosuccinate lyase (ADSL) is an enzyme with dual functions in *de novo* purine biosynthesis.  
74 It catalyzes the cleavage of succinyl groups to yield fumarate twice in *de novo* synthesis; it converts  
75 succinylaminoimidazole carboxamide ribotide (SAICAR) to aminoimidazole carboxamide ribotide  
76 (AICAR) and succinyladenosine monophosphate (S-AMP) to adenosine monophosphate (AMP).  
77 Adenylosuccinate lyase deficiency (ASLD) is a human syndrome associated with a spectrum of  
78 symptoms including seizures, ataxia, cognitive impairment, and autistic-like behaviors (3–5). Symptoms  
79 range in severity from mild to severe and are negatively correlated with the degree of residual ADSL  
80 activity (6). In the most extreme cases, ASLD is neonatally fatal due to prenatal growth restriction,

81 encephalopathy, and intractable seizures (6,7). This autosomal recessive neurometabolic disorder has  
82 been reported in over 50 patients since its original characterization in 1969; for these cases, over 40  
83 separate mutations in adenylosuccinate lyase (ADSL) are associated with the disease state (8–10).

84         There are competing hypotheses about the etiology of ASLD symptoms. Severity of symptoms  
85 has been positively correlated with the level of accumulation of two succinyl nucleosides, SAICAr and S-  
86 Ado, in the urine and cerebrospinal fluid (9,11). These nucleosides are the dephosphorylated forms of the  
87 ADSL substrates SAICAR and S-AMP, respectively, and their accumulation in body fluids is the only  
88 biochemical marker of the disorder. Previous findings associated a lower ratio of S-Ado/SAICAr with  
89 more severe symptoms, and it was hypothesized that S-Ado is protective while SAICAr is toxic (9,11).  
90 Recent findings indicate that this ratio is not predictive of phenotype severity, but correlates to the  
91 patient's development and age during sample collection (6). Dephosphorylation of SAICAR to SAICAr  
92 has also been proposed to be a detoxification mechanism to reduce the toxic accumulation of SAICAR in  
93 affected cells (12). Thus, questions remain about the role of ADSL substrates in disease etiology.

94         It is also hypothesized the blockage of purine biosynthesis specifically contributes to ASLD  
95 symptoms. Deficiency of ADSL is expected to result in decreased concentrations of purine products,  
96 particularly adenine nucleotides, due to the dual function of this enzyme in the biosynthesis of AMP.  
97 However, no deficit in purines has been detected in patients; measurements of purine levels in kidney,  
98 liver, and muscle cells of ASLD patients are normal (13). Residual activity in patients likely contributes  
99 to the conservation of purine levels. Measurements of ADSL enzyme activity indicate that 3% residual  
100 activity is sufficient to convert S-AMP to AMP; although metabolic flux is greatly hindered (13).  
101 Moreover, a reduction in ADSL activity can be circumvented via supply of purines through the salvage  
102 pathway and dietary intake (14). In this case, affected cells and tissues would be dependent on high  
103 activities of the salvage enzymes to maintain purine levels. It remains possible that a deficit in the ability  
104 to synthesize purines *de novo* at a specific developmental stage contributes to phenotypic outcome, but  
105 evidence in support of these hypotheses to explain ADSL phenotypes is still lacking.

106           The pathological mechanisms causing the disorder also remain unknown (15–17). We are  
107 interested in probing the mechanism behind the disorder using *Caenorhabditis elegans*, an established  
108 organism for studying metabolism and associated metabolic disorders (18). The purine metabolic  
109 pathways are highly conserved across all eukaryotes, including *C. elegans* (19). This level of conservation  
110 indicates the functionality of *C. elegans* as a model for errors of purine metabolism. In addition to  
111 metabolic conservation, *C. elegans* provides a well-characterized nervous system that is essential for  
112 studying symptomatic aspects of ASLD. By using a model with a simple and fully identified neural  
113 network (20), the nervous system function can be studied under conditions of ADSL depletion. Thus, *C.*  
114 *elegans* has physiological benefits that other models, such as mammalian cell culture and yeast (21,22),  
115 do not provide.

116           We report here on the development of *C. elegans* as a model for ASLD using a mutant allele and  
117 RNAi knockdown of the *adsl-1* gene. Extensive analysis of locomotive and reproductive phenotypes  
118 gives insight into which biological processes are disrupted by a decrease in ADSL function. We find that  
119 altered cholinergic synaptic transmission impacts muscle function in mutants. We examine metabolite  
120 levels in control and *adsl-1* animals and use pharmacological and metabolite supplementation to associate  
121 substrate accumulation and purine production with the different phenotypes of ASLD in *C. elegans*. We  
122 propose a similar linkage between metabolic perturbation and phenotype in humans due to the high level  
123 of conservation of *de novo* purine biosynthesis.

124

125

126

127

128

129

## 130 **Results**

131 We used the *adsl-1(tm3328)* mutant and RNAi of *adsl-1* in the RNAi hypersensitive strain *eri-*  
132 *1(mg366)* (23,24) to model adenolysosuccinate lyase deficiency. The *tm3328* allele is a 792 bp deletion  
133 that removes over half of the *adsl-1* coding sequence, including the N-terminus. RNAi of *adsl-1* results in  
134 efficient yet incomplete knockdown of message levels to approximately 20% of controls (Fig 2A). We  
135 observed reproductive, developmental and locomotion defects in both *adsl-1(tm3328)* and *adsl-1(RNAi)*  
136 animals.

137

### 138 **Disruption of *adsl-1* function results in reproductive defects and embryonic lethality**

139 Neither *adsl-1(tm3328)* mutants nor animals exposed to RNAi of *adsl-1* for their whole life cycle  
140 are capable of producing progeny (n>100). Compared to N2 strain control animals, the gonad arms of  
141 *adsl-1(tm3328)* adults appear deformed, severely shrunken, and lack any indication of mature germ cell  
142 production (S1 Fig), indicating a requirement for *adsl-1* in normal gonadogenesis. To reveal processes  
143 that may require *adsl-1* function acutely, we also exposed fertile egg-laying adult animals in their first day  
144 of egg-laying to RNAi. Within 24 hours, these animals display an array of phenotypes. We observed both  
145 germ cells in the proximal gonad and oocytes in double file as opposed to single file in the proximal  
146 gonad, indicating abnormal progression of oogenesis (Fig 2). Deterioration of gonad arms was also  
147 evident (Fig 2, S2 Fig). We conclude that *adsl-1* is required for normal development of the gonad and is  
148 required acutely for maintenance of normal oogenesis.

149 Animals exposed to *adsl-1(RNAi)* starting in the mid-fourth larval stage produce early offspring  
150 that can be phenotypically examined. We observed a high degree of embryonic lethality (18%) in these  
151 offspring (Fig 3A). Thus, not only is oogenesis hindered when *adsl-1* function is decreased, but  
152 embryonic development is disrupted as well. We also examined the *adsl-1(tm3328)* mutant strain for  
153 evidence of developmental lethality. The sterility of the *adsl-1(tm3328)* strain requires the strain to be  
154 maintained using a balancer chromosome. Because the hT2 balancer is homozygous lethal, a genotypic

155 ratio of one *adsl-1(tm3228)* homozygote for every two balanced heterozygotes should segregate from the  
156 balanced heterozygote. However, only 16% of the progeny of balanced heterozygotes were homozygous  
157 *adsl-1(tm3328/tm3328)* mutants (Fig 3B). This altered genotypic ratio of one homozygote for every 5.3  
158 heterozygotes indicates that 62% of the *adsl-1(tm3328/tm3328)* population is missing. We conclude that  
159 there is a developmental lethality for the homozygous mutants, similar to the embryonic lethality of *adsl-*  
160 *I*(RNAi).

161

### 162 **Disruption of *adsl-1* function results in neuromuscular defects**

163 *adsl-1(tm3328)* and *adsl-1*(RNAi) animals are noticeably sluggish compared to control animals.  
164 We quantified crawling speed of *adsl-1(tm3328)*, demonstrating that they have severely slowed  
165 locomotion (Fig 4A). Upon transfer to liquid, *C. elegans* will continually thrash for over 90 minutes  
166 before alternating to periods of inactivity (25). We also manually counted the thrashing rate during this  
167 active period as an indication of body wall muscle function. Thrashing rate is reduced for both *adsl-*  
168 *I*(*tm3328*) and *adsl-1*(RNAi) animals; mutants and RNAi animals exhibit a 77% and 22% reduction in  
169 thrashing rate, respectively (Fig 4B). The decreased phenotypic severity of *adsl-1*(RNAi) likely reflects  
170 the incomplete knockdown by RNAi (Fig 2A).

171 *adsl-1(tm3328)* animals appear uncoordinated in addition to their sluggish movement. Thus, we  
172 measured additional parameters of thrashing animals using ImageJ. The *adsl-1(tm3328)* animals have a  
173 78% reduction in the average speed at which their body bends, consistent with manual counts of thrashing  
174 rates (Fig 4C). Control N2 animals exhibit an undulatory pattern of locomotion (26,27) with a normally  
175 distributed angle of bending intensity around an average of 37.8 while *adsl-1(tm3328)* animals display a  
176 clearly distinct distribution of bend intensities (Fig 4D). Mutant animals bend with less intensity relative  
177 to N2 controls during the majority of contractions. Despite the preference for these small bends, *adsl-*  
178 *I*(*tm3328*) are capable of contractions comparable to and beyond that of N2; a small proportion of mutant  
179 bends exceed the typical range of bending for N2 controls. Body bends of minimal or maximal intensity



180 in *adsl-1(tm3328)* deviate greatly from the undulatory bending required for coordinated movement in *C.*  
181 *elegans* (28,29). We conclude that both pace and quality of muscle contractions is altered in *adsl-1* mutant  
182 animals.

183

#### 184 **Disruption of *adsl-1* function affects cholinergic signaling**

185 We next considered the question of how disruption of *adsl-1* function might result in the observed  
186 muscle contraction phenotypes. We investigated the hypotheses that hindered locomotion was caused by  
187 either disruption of the cholinergic synaptic transmission, which is required for potentiating action  
188 potential firing in body wall muscle, or the reduced response of the muscle cells to this signal (30). We  
189 assessed the functionality of pre-synaptic neurons and post-synaptic muscle tissue in the neuromuscular  
190 junction of cholinergic body wall muscles using levamisole and aldicarb. Levamisole is a cholinergic  
191 receptor agonist that stimulates body wall muscles to the point of paralysis (31–33). Because levamisole  
192 only affects postsynaptic function, resistance to levamisole is indicative of altered function in the muscle.  
193 *adsl-1(tm3328)* displayed mild resistance to levamisole over a five hour period of exposure. Following 24  
194 hours of continual exposure, no difference was observed between *adsl-1(tm3328)* and N2 controls (Fig  
195 5A). Resistance to aldicarb has been shown for mutants in both pre-synaptic and post-synaptic tissue (34).  
196 *adsl-1(tm3328)* displayed a strong resistance to aldicarb over a five hour period of exposure (Fig 5B).  
197 Following 24 hours of continual exposure, 25% of the *adsl-1(tm3328)* animals resisted paralysis (Fig 5B).  
198 We conclude that *adsl-1* mutants exhibit a stronger resistance to aldicarb than levamisole. The mild  
199 resistance to levamisole may indicate that muscle response is suboptimal. However, the resistance to  
200 aldicarb indicates that neural transmission is significantly affected by loss of *adsl-1* activity.

201

202

203

204 **Reduction of *adsl-1* function alters intermediate metabolite levels but has no effect on global purine**  
205 **levels**

206 To investigate the hypotheses that changes in ADSL substrate or purine levels are causative of  
207 phenotypes, we quantified metabolite levels in *adsl-1*(RNAi) animals using LC-MS. We specifically  
208 measured the levels of both ADSL substrates, SAICAR and S-AMP, in six biological replicate samples of  
209 *adsl-1*(RNAi) and control *eri-1* animals. There were no detectable peaks for SAICAR in any of the  
210 control RNAi replicates (Fig 6A), indicating that the amount of SAICAR is typically below the threshold  
211 for metabolite detection via our methods. In all six replicates of *adsl-1*(RNAi), SAICAR was easily  
212 detected (Fig 6A), indicating that there is an increase in SAICAR levels when *adsl-1* is knocked down.  
213 Global levels of S-AMP are also increased in *adsl-1*(RNAi) compared to the control (Fig 6B). This data  
214 suggests that knockdown of *adsl-1* leads to the accumulation of ADSL substrates, similar to substrate  
215 accumulation shown in humans.

216 We also measured global levels of purine monophosphate metabolites in *adsl-1*(RNAi) and  
217 control animals. Interestingly, none of these metabolites showed statistically significant changes upon  
218 *adsl-1* knockdown. AMP is the only metabolite that shows a downward trend (Fig 6C) with an average 37%  
219 decrease in the *adsl-1* samples, relative to controls. Levels of IMP do not exhibit any difference in *adsl-1*(RNAi) compared to the control (Fig 6D). Levels of XMP are more variable than that of AMP or IMP,  
220 but do not display any relative difference when comparing *adsl-1*(RNAi) to controls (Fig 6E). The  
221 relative levels of GMP have the largest variance of the examined metabolites for *adsl-1* RNAi, but did not  
222 exhibit a statistically significant difference from the control (Fig 6F). Overall, this data indicates that there  
223 is no significant decrease in purine metabolite levels caused by a knockdown of *adsl-1*.

225

226 **Reduced *de novo* synthesis contributes to the reproductive phenotype**

227 To investigate the potential toxic effects of intermediate metabolite accumulation and the  
228 blockage of *de novo* purine production as causative of phenotypes, we examined the effect of both

229 supplementation with purines and inhibition of substrate production on phenotypic outcome. Even though  
230 we detect no global deficit in purine levels, we investigated whether decreased purine production is  
231 functionally contributing to the reproductive phenotype by supplementing with purine products. This  
232 supplementation strategy would allow the purine salvage pathway to more efficiently compensate for the  
233 blockage of *de novo* biosynthesis. To block substrate accumulation, we used methotrexate, an  
234 antimetabolite that inhibits *de novo* purine biosynthesis upstream of ADSL (35,36).

235         Supplementation of cultures with purine products restored fertility in *adsl-1*(RNAi) animals.  
236 Fertility was restored to 90% of animals upon adenosine supplementation and 80% of animals upon  
237 guanosine supplementation (Fig 7A). Fecundity was also restored by supplementation with purines.  
238 Supplementation with adenosine restored fecundity to 65% of control levels and supplementation with  
239 guanosine restored fecundity to 62% of control levels (Fig 7B). Supplementation of cultures with  
240 methotrexate had no effect on the fecundity or fertility of *adsl-1* RNAi animals (Fig 7B); evidence for the  
241 uptake and inhibitory effect of methotrexate is shown below. Thus, the sterility phenotype is linked to a  
242 deficit in *de novo* purine synthesis, and we detected no role for substrate accumulation in the fertility  
243 phenotype.

244

#### 245 **Substrate buildup contributes to the neuromuscular phenotype**

246         We also examined the effect of methotrexate and purine supplementation on the phenotypic  
247 outcome of *adsl-1(tm3328)* and *adsl-1*(RNAi) animals using thrashing assays. Both *adsl-1(tm3328)* and  
248 *adsl-1*(RNAi) displayed improved locomotion upon methotrexate supplementation. The supplemented  
249 mutants displayed a 212% increase in thrashing rate compared to the control mutants, but are only  
250 restored to ~45% of the N2 control (Fig 8A). The attenuation of the milder phenotype of *adsl-1*(RNAi) is  
251 more robust than that of the mutants; these animals thrash at a rate indistinguishable from the empty  
252 vector control (Fig 8B). We then used LC-MS to quantify the effects of methotrexate supplementation on  
253 *adsl-1*(RNAi) animals. As expected, methotrexate supplementation results in a decrease in SAICAR

254 levels in *adsl-1*(RNAi) animals (Fig 8C). In contrast, the minor increase in S-AMP observed in *adsl-*  
255 *1*(RNAi) is not significantly affected by methotrexate supplementation (Fig 8D). Thus, methotrexate  
256 supplementation effectively decreases the accumulation of SAICAR, the first ADSL substrate in the de  
257 novo pathway. We also investigated whether a deficit in purine production is functionally contributing to  
258 the neuromuscular phenotype, similar to the reproductive phenotype. Supplementation with adenosine,  
259 sufficient to restore fertility and fecundity, had no effect on thrashing rate for *adsl-1(tm3328)* or the N2  
260 control (Fig 8E). We conclude from these data that SAICAR accumulation likely affects neuromuscular  
261 function of *adsl-1*.

262

## 263 Discussion

264 We have established *C. elegans* as an effective model for studying adenylosuccinate lyase  
265 deficiency (ASLD). *C. elegans* with reduced or eliminated function of ADSL have phenotypic and  
266 biochemical similarity to the human disorder. In both humans and *C. elegans*, individuals heterozygous  
267 for a mutation in ADSL are phenotypically normal, but homozygous individuals exhibit severe motor and  
268 developmental phenotypes (4,9,15). The locomotive defect in *C. elegans* mimics the muscle ataxia in  
269 human patients (15,16). Furthermore, metabolic analysis also shows similar substrate accumulation in  
270 whole animal lysates as in human patients (37). Phenotypic similarities were shown to be present in both  
271 *adsl-1* RNAi and *adsl-1(tm3328)* homozygotes, creating different genetic techniques to model this  
272 disorder.

273 Our observations regarding the sterility phenotype of *adsl-1* revealed disruption of both  
274 gonadogenesis and oogenesis. We found that the development of the gonad is severely hindered for both  
275 *adsl-1(tm3328)* and exposure to *adsl-1*(RNAi) during development. Additionally, normal oogenesis  
276 acutely requires the function of *adsl-1*. A decrease of *adsl-1* function following the L4 larval stage has  
277 minimal effect on gonadogenesis but disrupts the progression of maturing germ cells. Interestingly, the  
278 reproductive phenotypes are of similar severity when comparing the mutant to *adsl-1*(RNAi) animals.

279 Given that the RNAi knockdown is incomplete, we conclude that the reproductive system is quite  
280 sensitive to the level of *adsl-1* activity for proper development.

281 Embryonic development is also sensitive to levels of *adsl-1* activity. We can avoid the typical  
282 sterility of *adsl-1*(RNAi) by administering the RNAi following larval development. Under these  
283 conditions, there is significant embryonic lethality associated with *adsl-1*(RNAi). We also demonstrated a  
284 developmental defect in the *adsl-1(tm3228)* mutants as evidenced by the deficit in homozygous mutants  
285 from the progeny of the balanced heterozygotes. However, this defect cannot be specifically linked to  
286 embryonic development. The fluorescent marker associated with the balancer is not visible in eggs,  
287 preventing selection of homozygous mutant eggs from the progeny pool. Embryonic lethality is likely to  
288 contribute to lethality of *adsl-1(tm3328)* as it does for *adsl-1*(RNAi), but the possibility remains that post-  
289 embryonic lethality or failure of mutant oocytes to mature contributes to the deficit of *tm3328*  
290 homozygotes in the balanced strain.

291 *adsl-1* animals are slow and display an irregular pattern of movement, mimicking the phenotypic  
292 outcome for ASLD in humans. Our data suggest a flaw in the muscle activation strategy behind the  
293 sinusoidal motion of *C. elegans* (38). While locomotion was slowed for both *adsl-1(tm3328)* and *adsl-*  
294 *1*(RNAi), the phenotype was more severe in *adsl-1(tm3328)* mutants. The milder locomotory phenotype  
295 of *adsl-1*(RNAi) likely reflects more residual enzyme activity and a less stringent requirement for high  
296 ADSL activity in locomotion compared to gonadogenesis and fertility. Nevertheless, *adsl-1*(RNAi) is an  
297 excellent model of the human syndrome, paralleling both a level of residual gene activity and a  
298 neuromuscular phenotype.

299 Given the evidence for a disruption in the patterning of muscle activation during locomotion, we  
300 investigated cholinergic signaling as a possible cause for this locomotive phenotype. A moderate  
301 resistance to levamisole in the *adsl-1* mutants indicates a variation in post-synaptic body wall function.  
302 Because levamisole can only stimulate the muscle tissue, we suggest that the resistance must arise from a  
303 defect in cholinergic receptors or the initiation of the contraction within the muscle itself. This assay

304 reveals a tissue target that is involved in the locomotive phenotype. However, the more prominent  
305 resistance to aldicarb provides additional insight. Resistance to aldicarb can arise from defects in pre-  
306 synaptic acetylcholine release or from the post-synaptic cholinergic response. Because our levamisole  
307 assay exposed an issue with post-synaptic tissue, we examined the aldicarb resistance with this in mind.  
308 *adsl-1* mutants paralyze much slower on aldicarb and are capable of resisting paralysis past 24 hours of  
309 exposure. Because the aldicarb paralysis curve does not resemble that of levamisole, we conclude that  
310 there are additional factors contributing to the aldicarb resistance in pre-synaptic cholinergic neurons.  
311 This finding suggests that altered neuromuscular transmission may contribute to the muscular ataxia  
312 observed in ADSL patients.

313 By measuring metabolite levels for *adsl-1*(RNAi) animals, we have established that knockdown  
314 of *adsl-1* in *C. elegans* also results in metabolic similarity to the human syndrome. We did not measure  
315 metabolite levels in mutant strain because the sterility and developmental lethality associated with *adsl-1*  
316 *(tm3328)* prevents us from obtaining the large population of homozygous mutants required for LC-MS  
317 analysis. In addition to the limitations of the mutant strain, *adsl-1*(RNAi) was chosen for metabolomics  
318 analysis because this treatment is predicted to best model the human syndrome. The accumulation of the  
319 biosynthetic intermediates SAICAR and S-Ado during knockdown of *adsl-1* closely resembles the  
320 SAICAR and S-Ado accumulation observed across numerous human patients and tissue samples (3,6,11).  
321 As such, *adsl-1* knockdown in *C. elegans* mimics the primary diagnostic biochemical markers of ASLD  
322 in humans.

323 Interestingly, knockdown of *adsl-1* did not significantly affect any of the purine monophosphate  
324 products of *de novo* synthesis. The salvage biosynthesis pathways likely contribute to homeostatic  
325 mechanisms that maintain global purine levels in the absence of efficient *de novo* synthesis. It is likely  
326 that these animals are recycling enough purines from their diets to accommodate for the blockage of *de*  
327 *novo* biosynthesis but this model remains to be tested. Our metabolite measurements are derived from  
328 mixed-stage, whole-animal lysates. Thus, it remains possible that certain cells, tissues or developmental

329 stages do not successfully maintain purine levels. Increased demand for purines or low activity of the  
330 salvage enzymes could alter purine levels for specific cells or developmental stages; more affected cell  
331 types could be masked by the whole-animal scale of metabolite measurements. Even with this possibility,  
332 the global maintenance of purine monophosphate levels still suggests compensation for the blockage of  
333 *de novo* synthesis in *adsl-1*(RNAi) animals. This maintenance of global purine levels is consistent with  
334 previous findings for adenine and guanine concentrations in patients and disease models with decreased  
335 ADSL function (13,21). Once again, metabolic profiling of *adsl-1*(RNAi) in *C. elegans* mimics the  
336 findings for human patients with decreased ADSL function, indicating the effectiveness of this model for  
337 studying ASLD.

338         Supplementation with individual purine products results in restoration of fertility. Each  
339 supplement can be converted to IMP, the central metabolite of purine synthesis, through the salvage  
340 pathways. In this way, these supplementations can overcome the blockage of IMP biosynthesis that  
341 results from the first function of ADSL, conversion of SAICAR to AICAR. However, adenosine is the  
342 only supplement that overcomes the second blockage of ADSL function, conversion of S-AMP to AMP.  
343 For this reason, it is interesting that both of the tested purine supplements are able to independently  
344 reverse the sterility of *adsl-1*(RNAi). We observed that adenosine supplementation is more robust than  
345 guanosine, but guanosine is still capable of restoring fertility to a significant extent. This result suggests  
346 that compensation for the second enzymatic function of ADSL is not as crucial for restoring fertility to  
347 *adsl-1*(RNAi) or that residual levels of ADSL-1 more easily suffice for this biochemical step.

348         Fertility restoration upon purine product supplementation indicates that a decrease in *de novo*  
349 purine production contributes to this phenotype. Furthermore, the correlation of sterility to the blockage  
350 of *de novo* synthesis is also predicted to be related to a potential increased demand for purines during the  
351 rapid division in gonad development when germ cells are dividing. A high demand for purines during  
352 reproductive development may cause a gonad-specific deficit of purines that is not reflected through  
353 metabolomics analysis for whole animal lysates of mixed age. Due to the severity of ASLD in humans,

354 reproduction is not an option, so any direct correlation with the reproductive phenotype is unknown.  
355 Despite this, the linkage of a phenotype to a blockage of *de novo* purine formation in *C. elegans* indicates  
356 some of the human symptoms may have the same linkage. For this reason, one possible therapeutic  
357 approach to ASLD would be to supplement additional purines to the diets of affected individuals in  
358 combination with a block to purine biosynthesis.

359 Our finding that methotrexate supplementation alleviates the locomotive defect for both *adsl-*  
360 *1(tm3328)* and *adsl-1(RNAi)* suggests that substrate accumulation is causative of this phenotype.  
361 Metabolomics analysis of *adsl-1(RNAi)* specifically suggests that SAICAR accumulation is causative of  
362 this neuromuscular phenotype. Although methotrexate is capable of improving the locomotion of *adsl-*  
363 *1(RNAi)* to that of the empty vector control, methotrexate does not fully ameliorate the locomotive  
364 phenotype of *adsl-1(tm3328)*. It is possible that SAICAR accumulates to a greater extent in *adsl-*  
365 *1(tm3328)* than *adsl-1(RNAi)*. In this case, methotrexate supplementation may not reduce SAICAR levels  
366 enough to fully attenuate the severe locomotive phenotype of *adsl-1(tm3328)*. Metabolomics analysis of  
367 *adsl-1(tm3328)* could reveal if this is the case, but is not technically feasible at this time.

368 The correlation between SAICAR accumulation and the locomotive defect is particularly  
369 interesting due to phenotypic similarity to muscular ataxia in humans. Because of this correlation, our  
370 data suggests that the motor control of humans may be improved by blocking SAICAR accumulation in a  
371 similar manner. The high conservation of purine biosynthesis indicates that a therapeutic approach using  
372 *de novo* synthesis inhibition could alleviate symptoms in humans. While these results expand on the  
373 relevance of SAICAR accumulation to phenotype, this study provides a crucial role in understanding the  
374 linkage between metabolic disturbance and disorder phenotype.

375

376

377



## 378 **Materials and methods**

### 379 ***C. elegans* culture and strains**

380 Strains were maintained on OP50 *Escherichia coli* as food under standard conditions at 20° C (39). We  
381 used the following strains; N2, *eri-1(mg366)*, and *adsl-1(tm3328)*. The N2 and GR1373 *eri-1(mg366)*  
382 strains were obtained from the Caenorhabditis Genetics Center (CGC). *adsl-1(tm3328)* was obtained from  
383 the National BioResource Project in Tokyo, Japan and outcrossed three times against N2 The outcrossed,  
384 balanced strain was named HV854. This allele is homozygous sterile and was balanced with hT2, a  
385 balancer for the first and third chromosomes of *C. elegans*; this balancer causes pharyngeal expression of  
386 GFP (40). Non-GFP homozygous *adsl-1(tm3328)* animals were used in phenotypic analysis.

387

### 388 **RNAi**

389 The *adsl-1* RNAi clone was from the *C. elegans* RNAi Library (Source BioScience, Nottingham, UK).  
390 RNAi feeding assays were carried out as described (23). Unless otherwise noted, we transferred mid-L4  
391 *eri-1* animals to RNAi plates and examined their progeny in assays. *E. coli* strain HT115 carrying the  
392 empty RNAi feeding vector (EV) L4440 was used as a control.

393

### 394 **Metabolite Supplementation**

395 We prepared filter-sterilized stock solutions of 22 mM methotrexate (Sigma) in DMSO and stock  
396 solutions of 117 mM adenosine (Sigma) in H<sub>2</sub>O with 10% 1 M NaOH and 150 mM guanosine (Sigma) in  
397 H<sub>2</sub>O with 25% 1 M NaOH. We added these solutions to OP50 seeded NGM plates to a final concentration  
398 of 22 μM methotrexate and 10 mM adenosine, guanosine. Following supplementation, we incubated the  
399 plates at room temperature for 1–2 days before use.

400

401

## 402 **Metabolomics**

403 LC-MS metabolomics analysis was done with the Metabolomics Core Facility at Penn State. ~50  $\mu$ L of  
404 animals were collected in ddH<sub>2</sub>O, flash frozen in liquid nitrogen and stored at 80°C. 15  $\mu$ L samples were  
405 extracted in 1 mL of 3:3:2 acetonitrile:isopropanol:H<sub>2</sub>O with 1  $\mu$ M chlorpropamide as internal standard.  
406 Samples were homogenized using a Precellys™ 24 homogenizer. Extracts from samples were dried under  
407 vacuum, resuspended in HPLC Optima Water (Thermo Scientific) and divided into two fractions, one for  
408 LC-MS and one for BCA protein analysis. Samples were analyzed by LC-MS using a modified version of  
409 an ion pairing reversed phase negative ion electrospray ionization method (41). Samples were separated on  
410 a Supelco (Bellefonte, PA) Titan C18 column (100 x 2.1 mm 1.9  $\mu$ m particle size) using a water-  
411 methanol gradient with tributylamine added to the aqueous mobile phase. The LC-MS platform consisted  
412 of Dionex Ultimate 3000 quaternary HPLC pump, 3000 column compartment, 3000 autosampler, and an  
413 Exactive plus orbitrap mass spectrometer controlled by Xcalibur 2.2 software (all from ThermoFisher  
414 Scientific, San Jose, CA). The HPLC column was maintained at 30°C and a flow rate of 200  $\mu$ L/min.  
415 Solvent A was 3% aqueous methanol with 10 mM tributylamine and 15 mM acetic acid; solvent B was  
416 methanol. The gradient was 0 min., 0% B; 5 min., 20% B; 7.5 min., 20% B; 13 min., 55% B; 15.5 min.,  
417 95% B, 18.5 min., 95% B; 19 min., 0% B; 25 min 0% B. The orbitrap was operated in negative ion mode  
418 at maximum resolution (140,000) and scanned from m/z 85 to m/z 1000. Metabolite levels were corrected  
419 to protein concentrations determined by BCA assay (Thermo Fisher).

420

## 421 **Quantitative RT-PCR**

422 Mid-L4 *eri-1* animals were placed on RNAi plates and RNA was isolated from mixed stage worms in the  
423 next generation using TRIZOL reagent (Invitrogen). 1  $\mu$ g of RNA was converted to cDNA using the  
424 qScript cDNA Synthesis Kit (Quanta Biosciences). cDNA was diluted 1:10 and used for quantitative PCR  
425 using SYBR Green and Applied Biosciences RT-PCR machine. Three primer sets, *cdc-42*, *tba-1*, and  
426 *pmp-3*, were used as expression controls.

427 *cdc-42* F: ctgctggacaggaagattacg; R: ctgggacattctcgaatgaag

428 *tba-1* F: gtacactccaactgatctctgctgaca; R: ctctgtacaagaggcaaacagccatg

429 *pmp-3* F: gttcccgtgttcactcat; R: acaccgtcgagaagctgtaga

430 *adsl-1* F: acagacaatggccgatcc; R: tgttggttcaattccttggc

431 Results represent the average of two biological replicates each assayed in duplicate technical replicates.

432

### 433 **Phenotypic Analysis**

434 **Linear Crawling Velocity.** Mid-L4 hermaphrodites were aged for 1 day at 20° C prior to the assay.

435 Individual animals were tracked as they crawled on OP50 seeded NGM plates. 30 second videos were

436 collected on a Nikon SMZ 1500 Stereoscope using NIS-Elements software from Nikon and analyzed

437 using ImageJ. The mean linear crawling velocity was calculated for each animal by tracing the

438 displacement of the animal's midpoint. The displacement of the midpoint was tracked as a vector as the

439 animal moved in a singular direction. Once the animal changed direction, a new vector was made to track

440 movement in that direction; this process was repeated for the length of each video. Crawling velocity was

441 determined by dividing each vector length by the corresponding time. The velocity values from all vectors

442 in a video were averaged and adjusted for the time-fraction of each vector within the video.

443

444 **Thrashing Assay.** Mid-L4 hermaphrodites of each genotype were aged for 1 day at 20° C prior to the

445 assay. Individual animals were placed in a drop of M9 solution on the surface of an unspotted NGM plate.

446 After 1 minute of acclimation at room temperature, thrashes, the number of body bends, were counted for

447 1 minute using a Nikon SMZ645 Stereoscope.

448

449 **Bending Quantification.** Individual animals were aged and placed in M9 solution following the same

450 procedure as the thrashing assay. 30 second videos were collected on a Nikon SMZ1500 Stereoscope

451 using NIS-Elements software from Nikon. Videos were analyzed using ImageJ to create ideal conditions  
452 for computer-based quantification of *C. elegans* locomotion. First, the video background was subtracted  
453 using the rolling ball method. The background of each video is unchanging, allowing the starting frame to  
454 be subtracted from all frames. The videos were then converted to binary by setting a threshold with the  
455 “Otsu” thresholding algorithm. Binary videos of animals were processed through the wrMTrack plugin for  
456 ImageJ. Raw data of bending angle was obtained in the BendCalc format with bendDetect set to angle;  
457 this data provides bending angle for an animal at each frame of a video.

458         Raw data for the rate of change in bending angle were provided on a frame by frame basis for  
459 each video. The magnitude of these values were averaged to determine the bending speed for each animal;  
460 absolute magnitude was used to combine abduction and adduction into one dataset for all types of  
461 bending. Data points for the maximum bending extent were manually selected from raw data sets for each  
462 animal. The extent of each bend was determined by recording the value at each local maximum and  
463 minimum. These turning points represent the most extreme point in a bend before movement back to the  
464 mid-line of the animal. The absolute value of each bend was used for calculation of bending extent for  
465 each animal.

466

467 **Paralysis.** Two days prior to the assay, we added aldicarb (Sigma) or levamisole (Sigma) to unspotted  
468 NGM plates to a final concentration of 1 mM. We allowed the plates to dry at room temperature  
469 overnight then moved them to 4° C until the time of the assay. Approximately 20 mid-L4 hermaphrodites  
470 of each genotype were aged for 1 day at 20° C prior to the assay. We placed a 10 µl spot of OP50 *E. coli*  
471 solution on each plate and allowed it to dry for 30 minutes, concentrating the animals in a small area.  
472 Animals of a single genotype were placed on to an aldicarb plate and scored for paralysis every 30  
473 minutes as described (34).

474

475 **Egg-laying.** For the egg-laying assay, ten *eri-1* animals were placed on a plate containing the desired  
476 RNAi and supplementation. For each condition, ten second generation mid-L4 animals were placed onto  
477 individual plates. The number of eggs laid by each animal was counted over a five day period.

478

## 479 **Statistical Analysis**

480 Two-tailed student t tests were used to determine p values when comparisons were limited between two  
481 conditions. One-way or two-way ANOVA was carried out with appropriate post-tests to determine p  
482 values between three or more experimental conditions. In LC-MS analysis, we used Welch's two sample t  
483 test to calculate p values. We substituted all undetectable measurements with zeros to statistically  
484 compare conditions for LC-MS. In all figures: ns, not significant; \*, 0.01 <p< 0.05; \*\*, 0.001<p< 0.01;  
485 \*\*\*, p<0.001; \*\*\*\*, p<0.0001.

486

487

## 488 **Acknowledgements**

489 We thank A. Patterson and P. Smith in the Penn State Metabolomics Core Facility for technical assistance  
490 and advice. *tm* alleles were provided by the Mitani laboratory through the National Bio-Resource Project  
491 of the Ministry of Education, Culture, Sports, Science, and Technology of Japan, Japan. Other strains  
492 were provided by the Caenorhabditis Genetics Center, which is funded by National Institutes of Health  
493 Office of Research Infrastructure Programs (Grant P40 OD010440).

494

495

## 496 **References**

- 497 1. Jurecka A. Inborn errors of purine and pyrimidine metabolism. *J Inherit Metab Dis.* 2009;32:247–  
498 63.
- 499 2. Fang Y, French J, Zhao H, Benkovic S. G-protein-coupled receptor regulation of de novo purine  
500 biosynthesis: a novel druggable mechanism. *Biotechnol Genet Eng Rev [Internet].* 2013;29:31–48.  
501 Available from: <http://www.ncbi.nlm.nih.gov/pubmed/24568251>
- 502 3. Jaeken J. AN INFANTILE AUTISTIC SYNDROME Succinyladenosine Case-reports. *Pediatr*  
503 *Clin North Am.* 1983;1058–61.
- 504 4. Stone RL, Aimi J, Barshop B a, Jaeken J, den Berghe G, Zalkin H, et al. A mutation in  
505 adenylosuccinate lyase associated with mental retardation and autistic features. *Nat Genet.*  
506 1992;1(1):59–63.
- 507 5. Jaeken J, Wadman SK, Duran M, van Sprang FJ, Beemer FA, Holl RA, et al. Adenylosuccinase  
508 deficiency: an inborn error of purine nucleotide synthesis. *Eur J Pediatr [Internet].* 1988 Nov [cited  
509 2015 Jun 14];148(2):126–31. Available from: <http://www.ncbi.nlm.nih.gov/pubmed/3234432>
- 510 6. Zikanova M, Skopova V, Hnizda A, Krijt J, Kmoch S. Biochemical and structural analysis of 14  
511 mutant ADSL enzyme complexes and correlation to phenotypic heterogeneity of adenylosuccinate  
512 lyase deficiency. *Hum Mutat.* 2010;31:445–55.
- 513 7. van den Bergh FA, Bosschaart AN, Hageman G, Duran M, Tien Poll-The B. Adenylosuccinase  
514 deficiency with neonatal onset severe epileptic seizures and sudden death. *Neuropediatrics.* 1998  
515 Feb;29(1):51–3.
- 516 8. Mouchehgh K, Zikánová M, Hoffmann GF, Kretzschmar B, Kühn T, Mildemberger E, et al. Lethal  
517 Fetal and Early Neonatal Presentation of Adenylosuccinate Lyase Deficiency: Observation of 6  
518 Patients in 4 Families. *J Pediatr.* 2007;150.
- 519 9. Jurecka A, Zikanova M, Tyłki-Szymanska A, Krijt J, Bogdanska A, Gradowska W, et al. Clinical,

- 520 biochemical and molecular findings in seven Polish patients with adenylosuccinate lyase  
521 deficiency. *Mol Genet Metab.* 2008;94(4):435–42.
- 522 10. Gitiaux C, Ceballos-Picot I, Marie S, Valayannopoulos V, Rio M, Verrieres S, et al. Misleading  
523 behavioural phenotype with adenylosuccinate lyase deficiency. *Eur J Hum Genet.*  
524 2009;17(1):133–6.
- 525 11. Krijt J, Kmoch S, Hartmannová H, Havlíček V, Sebesta I. Identification and determination of  
526 succinyladenosine in human cerebrospinal fluid. *J Chromatogr B Biomed Sci Appl.* 1999;726(1–  
527 2):53–8.
- 528 12. Hürlimann HC, Laloo B, Simon-Kayser B, Saint-Marc C, Coulpier F, Lemoine S, et al.  
529 Physiological and toxic effects of purine intermediate 5-amino-4- imidazolecarboxamide  
530 ribonucleotide (AICAR) in yeast. *J Biol Chem.* 2011;286:30994–1002.
- 531 13. Van den Berghe G, Jaeken J. Adenylosuccinase deficiency. *Adv Exp Med Biol [Internet].* 1986  
532 Jan [cited 2015 Mar 16];195 Pt A:27–33. Available from:  
533 <http://www.ncbi.nlm.nih.gov/pubmed/3014834>
- 534 14. Van den Berghe G, Vincent MF, Jaeken J. Inborn errors of the purine nucleotide  
535 cycle:adenylosuccinase deficiency. *J Inherit Metab Discov.* 1997;20(2):193–202.
- 536 15. Ciardo F, Salerno C, Curatolo P. Neurologic aspects of adenylosuccinate lyase deficiency. *J Child*  
537 *Neurol.* 2001;16(5):301–8.
- 538 16. Jurecka A, Zikanova M, Kmoch S, Tylki-Szymańska A. Adenylosuccinate lyase deficiency. *J*  
539 *Inherit Metab Dis [Internet].* 2015 Mar [cited 2015 Mar 15];38(2):231–42. Available from:  
540 [http://www.pubmedcentral.nih.gov/articlerender.fcgi?artid=4341013&tool=pmcentrez&rendertype](http://www.pubmedcentral.nih.gov/articlerender.fcgi?artid=4341013&tool=pmcentrez&rendertype=abstract)  
541 [=abstract](http://www.pubmedcentral.nih.gov/articlerender.fcgi?artid=4341013&tool=pmcentrez&rendertype=abstract)
- 542 17. Spiegel EK, Colman RF, Patterson D. Adenylosuccinate lyase deficiency. *Mol Genet Metab.*  
543 2006;89(1–2):19–31.

- 544 18. Kuwabara PE, O'Neil N. The use of functional genomics in *C. elegans* for studying human  
545 development and disease. *J Inherit Metab Dis*. 2001;24:127–38.
- 546 19. Kappock TJ, Ealick SE, Stubbe J. Modular evolution of the purine biosynthetic pathway. *Curr*  
547 *Opin Chem Biol* [Internet]. 2000 Oct [cited 2015 Jun 14];4(5):567–72. Available from:  
548 <http://www.ncbi.nlm.nih.gov/pubmed/11006546>
- 549 20. White JG, Southgate E, Thomson JN, Brenner S. The Structure of the Nervous System of the  
550 Nematode *Caenorhabditis elegans*. *Philos Trans R Soc Lond B*. 1986;314(1165):1–340.
- 551 21. Gooding JR, Jensen M V., Dai X, Wenner BR, Lu D, Arumugam R, et al. Adenylosuccinate Is an  
552 Insulin Secretagogue Derived from Glucose-Induced Purine Metabolism. *Cell Rep*. The Authors;  
553 2015;13(1):157–67.
- 554 22. Chen P, Wang D, Chen H, Zhou Z, He X. The non-essentiality of essential genes suggests a loss-  
555 of-function therapeutic strategy for loss-of-function human diseases. *Genome Res*. 2016;26:1355–  
556 62.
- 557 23. Ahringer J. Reverse genetics. In: *The C. elegans Research Community*, editor. *WormBook*  
558 [Internet]. 2006. Available from: <http://www.wormbook.org>
- 559 24. Duchaine TF, Wohlschlegel JA, Kennedy S, Bei Y, Conte D, Pang K, et al. Functional proteomics  
560 reveals the biochemical niche of *C. elegans* DCR-1 in multiple small-RNA-mediated pathways.  
561 *Cell*. 2006;124(2):343–54.
- 562 25. Ghosh R, Emmons SW. Episodic swimming behavior in the nematode *C. elegans*. *J Exp Biol*.  
563 2008;211(Pt 23):3703–11.
- 564 26. Gray J. Undulatory propulsion in small organisms. *Nature*. 1951;168(4283):929–30.
- 565 27. Gray J, Lissmann HW. the Locomotion of Nematodes. *J Exp Biol*. 1964;41:135–54.
- 566 28. Butler VJ, Branicky R, Yemini E, Liewald JF, Gottschalk A, Kerr R a, et al. A consistent muscle  
567 activation strategy underlies crawling and swimming in *Caenorhabditis elegans*. *J R Soc Interface*.



- 568 2015;12(102):20140963.
- 569 29. Niebur E, Erdős P. Theory of the locomotion of nematodes: Dynamics of undulatory progression  
570 on a surface. *Biophys J*. 1991;60(5):1132–46.
- 571 30. Gao S, Zhen M. Action potentials drive body wall muscle contractions in *Caenorhabditis elegans*.  
572 *Proc Natl Acad Sci U S A*. 2011;108(6):2557–62.
- 573 31. Lewis JA, Wu C-H, Berg H, Levine JH. The genetics of levamisole resistance in the nematode  
574 *Caenorhabditis elegans*. *Genetics*. 1980;95:905–28.
- 575 32. Lewis JA, Wu C, Levine J, Berg H. Levamisole-resistant mutants of the nematode *Caenorhabditis*  
576 *elegans* appear to lack pharmacological acetylcholine receptors. *Neuroscience*. 1980;5(6):967–89.
- 577 33. Miller KG, Alfonso a, Nguyen M, Crowell J a, Johnson CD, Rand JB. A genetic selection for  
578 *Caenorhabditis elegans* synaptic transmission mutants. *Proc Natl Acad Sci U S A*.  
579 1996;93(22):12593–8.
- 580 34. Mahoney TR, Luo S, Nonet ML. Analysis of synaptic transmission in *Caenorhabditis elegans*  
581 using an aldicarb-sensitivity assay. *Nat Protoc*. 2006;1(4):1772–7.
- 582 35. Allegra CJ, Hoang K, Yeh GC, Drake JC, Baram J. Evidence for direct inhibition of de novo  
583 purine synthesis in human MCF-7 breast cells as a principal mode of metabolic inhibition by  
584 methotrexate. *J Biol Chem*. 1987;262(28):13520–6.
- 585 36. Fairbanks LD, Rückemann K, Qiu Y, Hawrylowicz CM, Richards DF, Swaminathan R, et al.  
586 Methotrexate inhibits the first committed step of purine biosynthesis in mitogen-stimulated human  
587 T-lymphocytes: a metabolic basis for efficacy in rheumatoid arthritis? *Biochem J*.  
588 1999;342(1):143–52.
- 589 37. Race V, Marie S, Vincent MF, Van den Berghe G. Clinical, biochemical and molecular genetic  
590 correlations in adenylosuccinate lyase deficiency. *Hum Mol Genet*. 2000;9(14):2159–65.
- 591 38. Karbowski J, Cronin CJ, Seah A, Mendel JE, Cleary D, Sternberg PW. Conservation rules, their

- 592 breakdown, and optimality in *Caenorhabditis* sinusoidal locomotion. *J Theor Biol.*  
593 2006;242(3):652–69.
- 594 39. Brenner S. The genetics of *Caenorhabditis elegans*. *Genetics.* 1974;77:71–94.
- 595 40. McKim KS, Peters K, Rose AM. Two types of sites required for meiotic chromosome pairing in  
596 *Caenorhabditis elegans*. *Genetics.* 1993;134(3):749–68.
- 597 41. Lu W, Clasquin MF, Melamud E, Amador-Noguez D, Caudy AA, Rabinowitz JD. Metabolomic  
598 analysis via reversed-phase ion-pairing liquid chromatography coupled to a stand alone orbitrap  
599 mass spectrometer. *Anal Chem.* 2010;82:3212–21.
- 600
- 601

## 602 Figures and Figure Legends

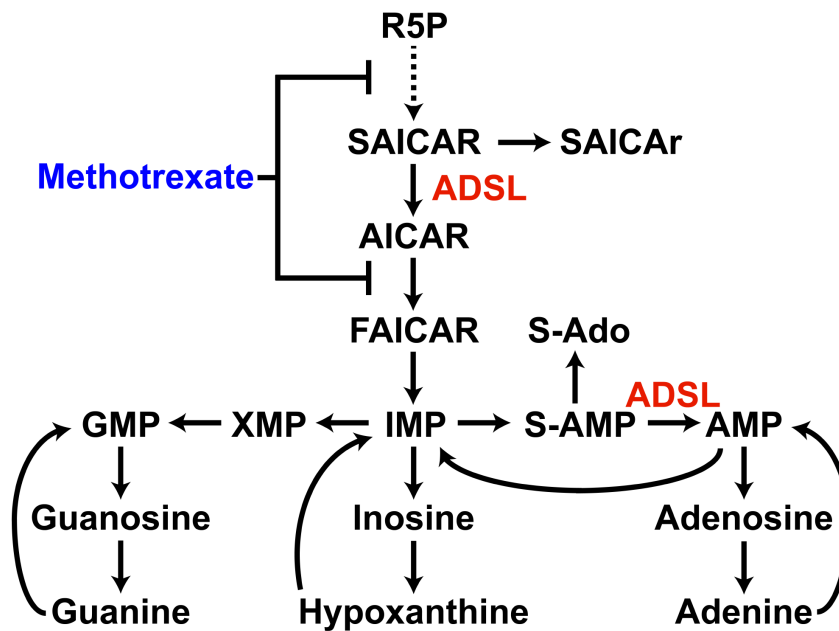

603

604 **Fig 1. Purine biosynthesis pathways.** ADSL functions twice in *de novo* purine biosynthesis.

605 Methotrexate is an antimetabolite that indirectly inhibits *de novo* synthesis. Abbreviations: R5P, ribose-5-

606 phosphate; SAICAR, succinylaminoimidazole carboxamide ribotide; SAICAr, succinylaminoimidazole

607 carboxamide riboside; ADSL, adenylosuccinate lyase; AICAR, aminoimidazole carboxamide ribotide;

608 IMP, inosine monophosphate; S-AMP, adenylosuccinate; S-Ado, succinyladenosine AMP, adenosine

609 monophosphate; XMP, xanthine monophosphate; GMP, guanosine monophosphate.

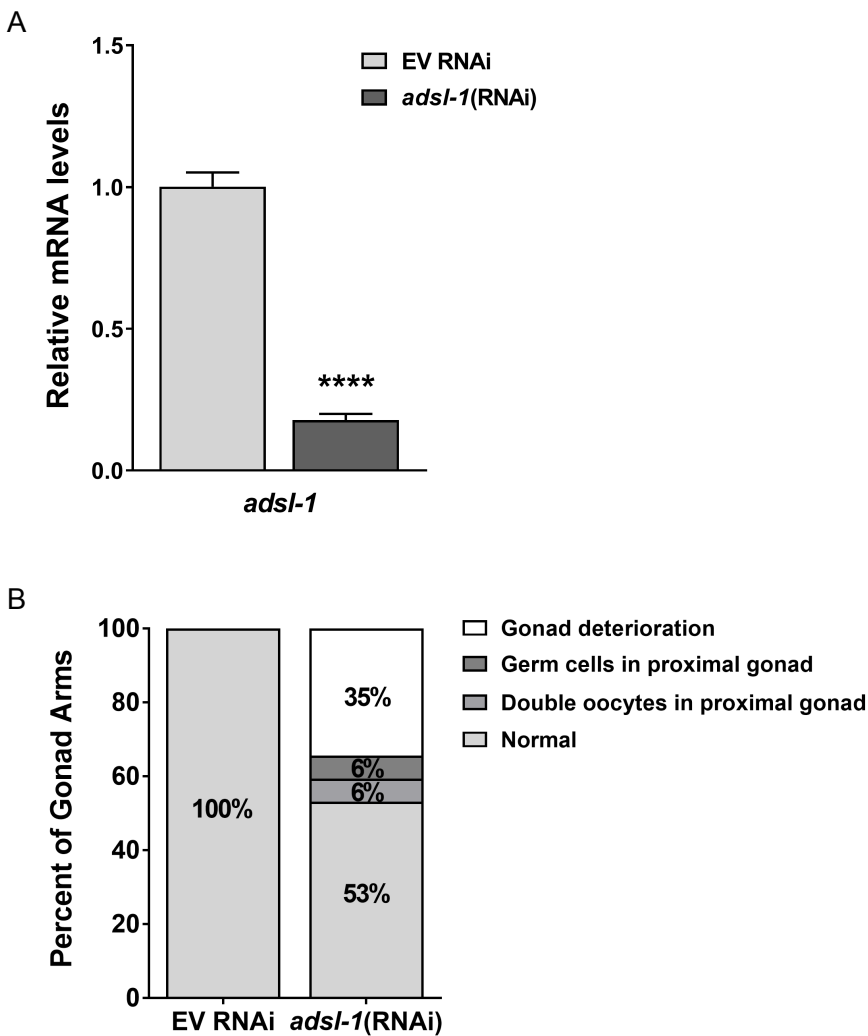

610 **Fig 2. Disruption of *adsl-1* function causes reproductive defects.** (A) *eri-1* animals were exposed to  
611 empty RNAi vector (EV) or *adsl-1*(RNAi) beginning at the mid-fourth larval stage and qRT-PCR was  
612 used to measure relative mRNA levels of *adsl-1* in subsequent generation. Values are averages from two  
613 biological replicates, performed in duplicate. Error bars represent S.D. \*\*\*\* represents  $p < 0.0001$  by  
614 student's two-tailed t test. (B) Gonad and oocyte development are disrupted within 24 hours of exposure  
615 of fertile first-day adults to *adsl-1*(RNAi).  $n = 32$  animals per condition. Numbers inside bars indicate  
616 actual percentages.

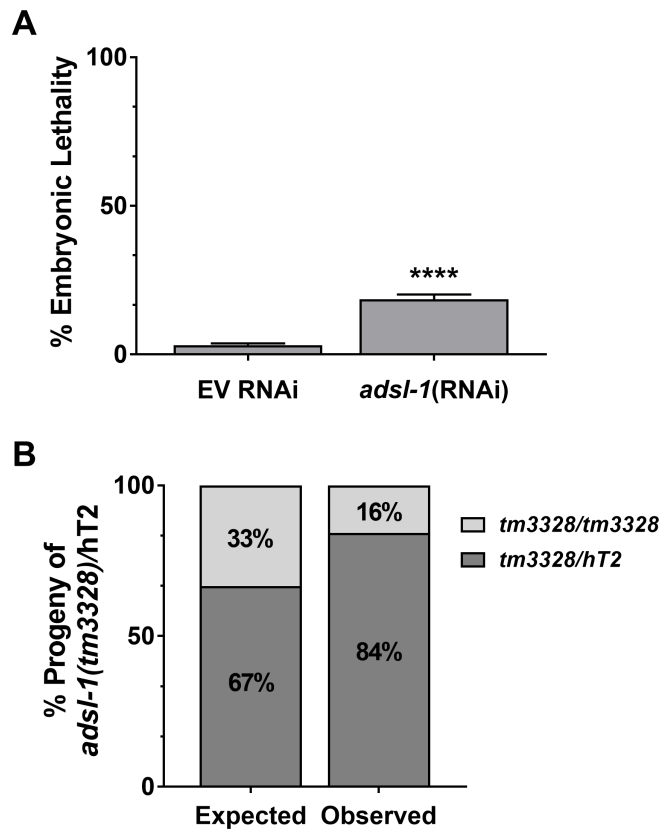

617 **Fig 3. Disruption of *adsl-1* function causes developmental lethality.** (A) Offspring of *eri-1* animals  
618 exposed to *adsl-1*(RNAi) beginning at the fourth larval stage display a high degree (18%) of embryonic  
619 lethality compared to the EV control (3%). n>450 eggs for each condition. Error bars are 95% confidence  
620 intervals. \*\*\*\* represents p<0.0001 using student's two-tailed t test. (B) Homozygous *adsl-1(tm3328)*  
621 mutants are less prevalent than expected in the population of progeny that segregate from the balanced  
622 *adsl-1(tm3328)/hT2* strain. n=695 animals for the observed genotypic ratio.

623

624

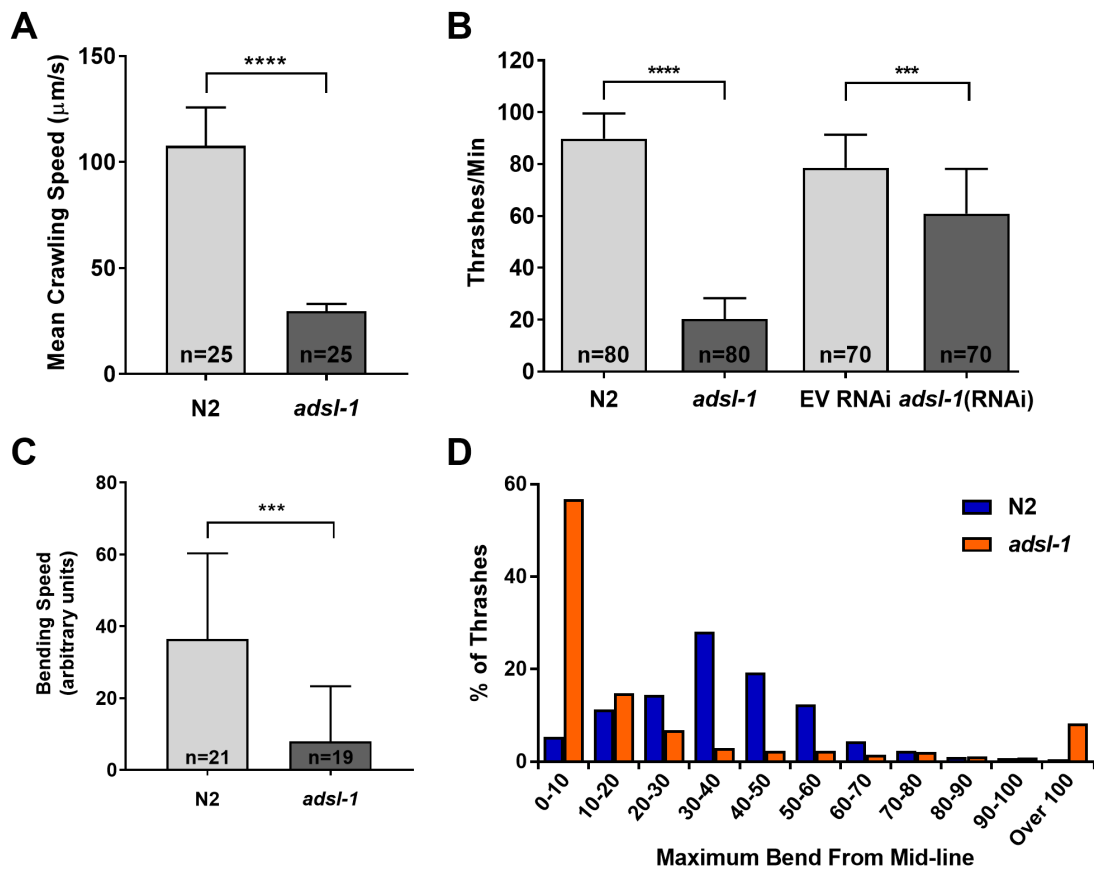

625

626 **Fig 4. Disruption of ADSL function causes movement defects.** (A) Comparison of average crawling  
627 speed for N2 control and *adsl-1(tm3328)* mutants. (B) *adsl-1(tm3328)* mutants and *adsl-1*(RNAi) have  
628 significantly decreased thrashing rate compared to N2 and empty vector (EV) control, respectively. (C)  
629 Average bending speed during thrashing reflects the decreased thrashing rate of *adsl-1(tm3328)* mutants.  
630 (D) N2 animals display a normal distribution for degree of bending while thrashing in liquid. *adsl-*  
631 *1(tm3328)* mutants primarily exhibit a smaller degree of bending during thrashing, but a proportion of  
632 bending angles are significantly more pronounced. Actual sample sizes indicated on each bar for A-C. In  
633 D, n = 20 animals per condition. Error bars indicate S.D. \*\*\*, and \*\*\*\* represent p<0.001, and p<0.0001,  
634 respectively, calculated using student's two-tailed t test.

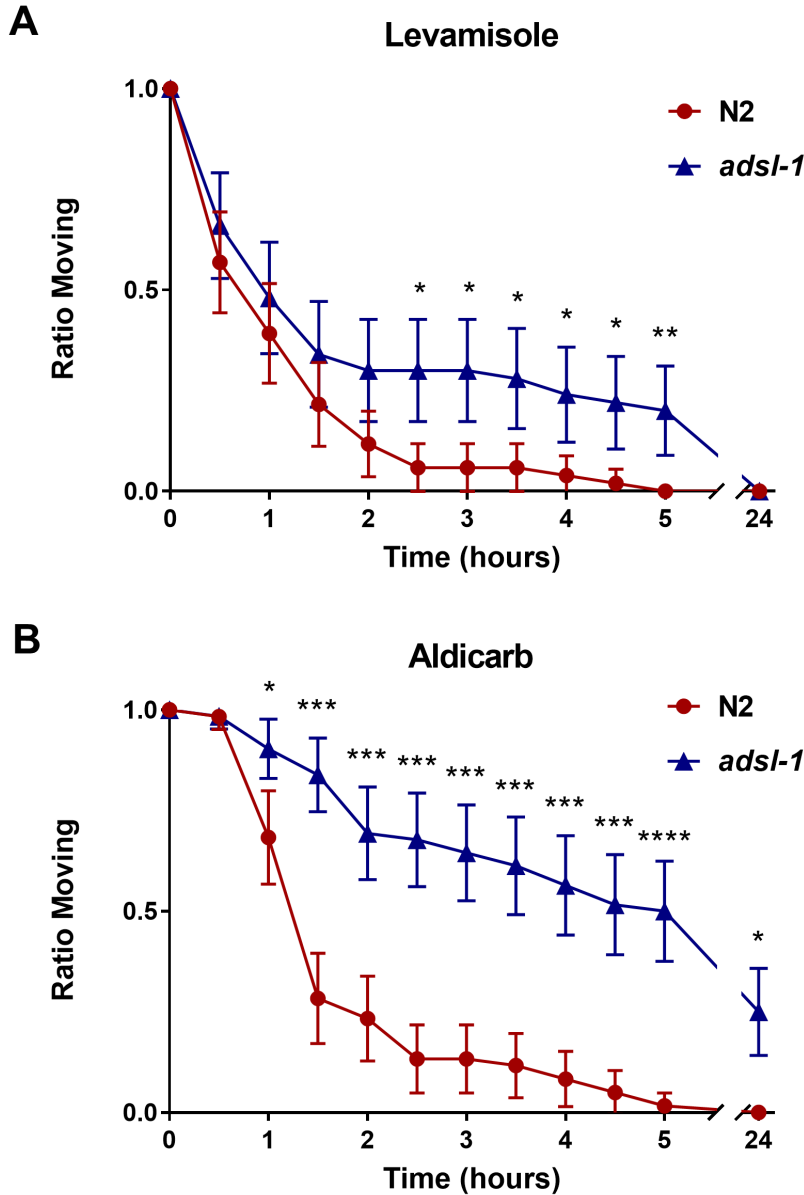

635

636 **Fig 5. *adsl-1* mutants have altered cholinergic synaptic signaling.** (A) *adsl-1* mutants are mildly  
637 resistant to the paralyzing effects of 1 mM levamisole. Resistance to levamisole is not sufficient to  
638 prevent paralysis after 24 hours of exposure. (B) *adsl-1* mutants are resistant to the paralyzing effects of  
639 1 mM aldicarb. Complete resistance to aldicarb is displayed by a subpopulation of animals after 24 hours  
640 of exposure. Error bars are 95% confidence intervals. n = 50 – 62 animals per condition. \*, 0.01 <p< 0.05;  
641 \*\*, 0.001<p< 0.01; \*\*\*, p<0.001; \*\*\*\*, p<0.0001, calculated using two-tailed t test.

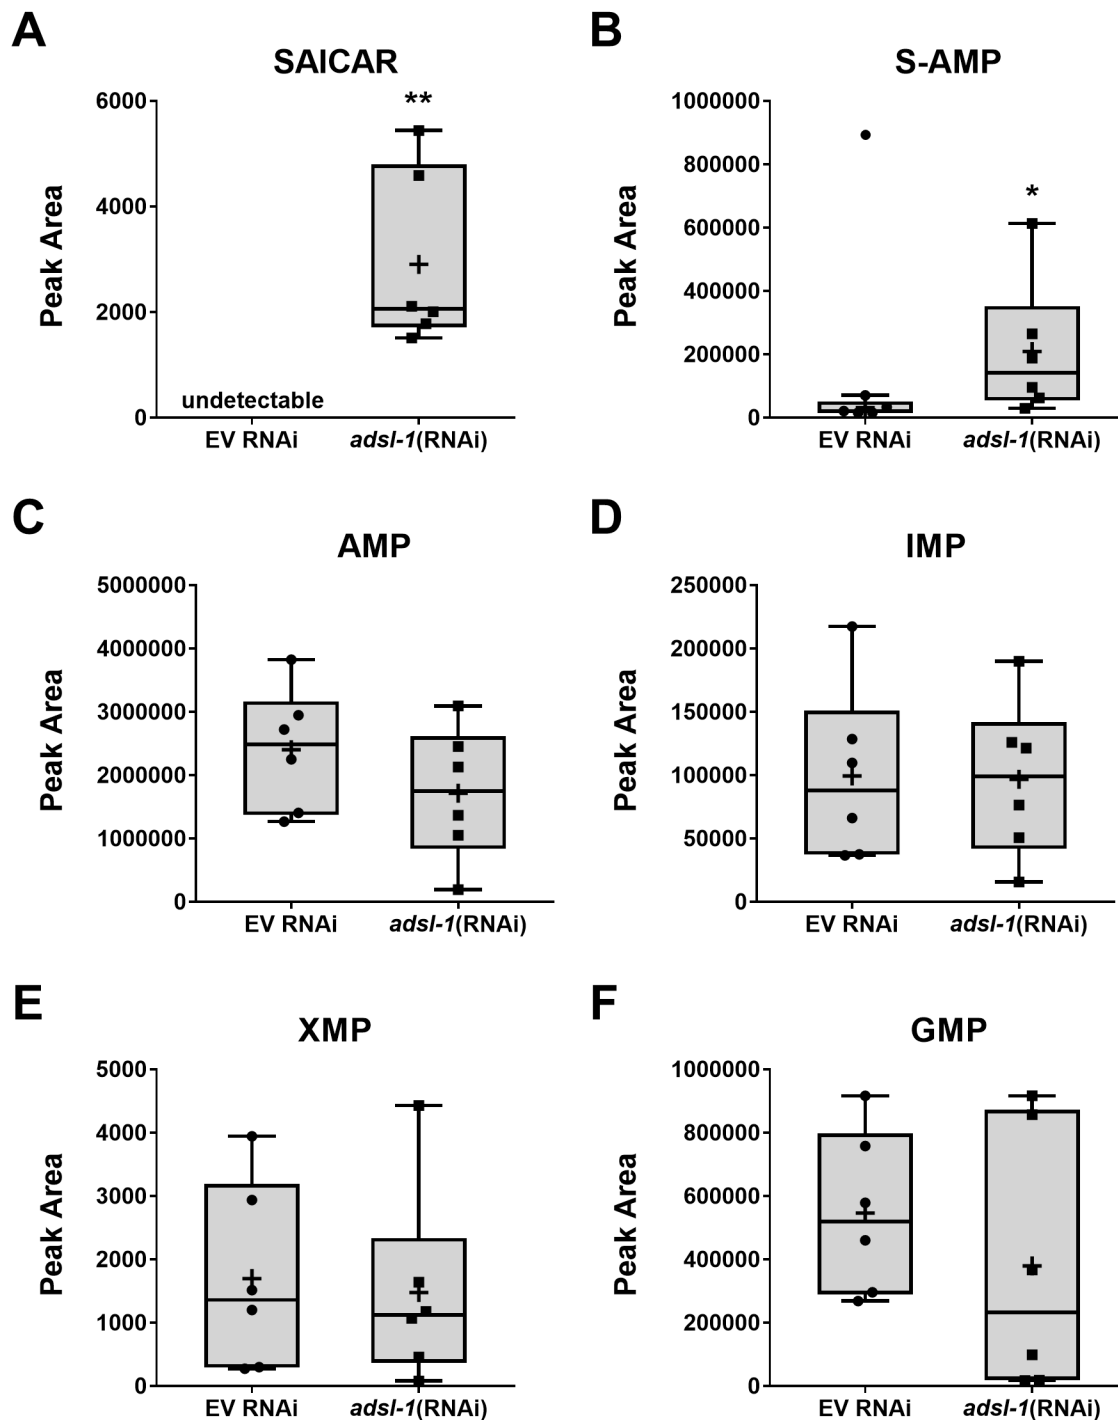

642

643 **Fig 6. *adsl-1* knockdown causes substrate accumulation, but does not affect purine levels. (A)**

644 SAICAR is undetectable via LC-MS in the empty vector control and detectable for all biological

645 replicates of *adsl-1*(RNAi). (B) S-AMP peak areas increase for *adsl-1*(RNAi) compared to the empty



646 vector control. One of the data points for the empty vector control was a statistical outlier and not  
647 included in statistical analysis. (C) LC-MS peak areas for AMP trend downward for *adsl-1*(RNAi), but  
648 are not statistically significant from the empty vector control. (D) IMP peak areas are unchanged by  
649 RNAi knockdown of *adsl-1*. (E) LC-MS peak areas for XMP do not significantly differ for *adsl-1*(RNAi).  
650 (F) GMP peak areas are unchanged by RNAi knockdown of *adsl-1*. Each data point represents one  
651 biological replicate. Boxes show the upper and lower quartile values, + indicates the mean value, and  
652 lines indicate the median. Error bars indicate the maximum and minimum of the population distribution. \*,  
653  $0.01 < p < 0.05$ ; \*\*,  $0.001 < p < 0.01$ , calculated using Welch's t test.

654

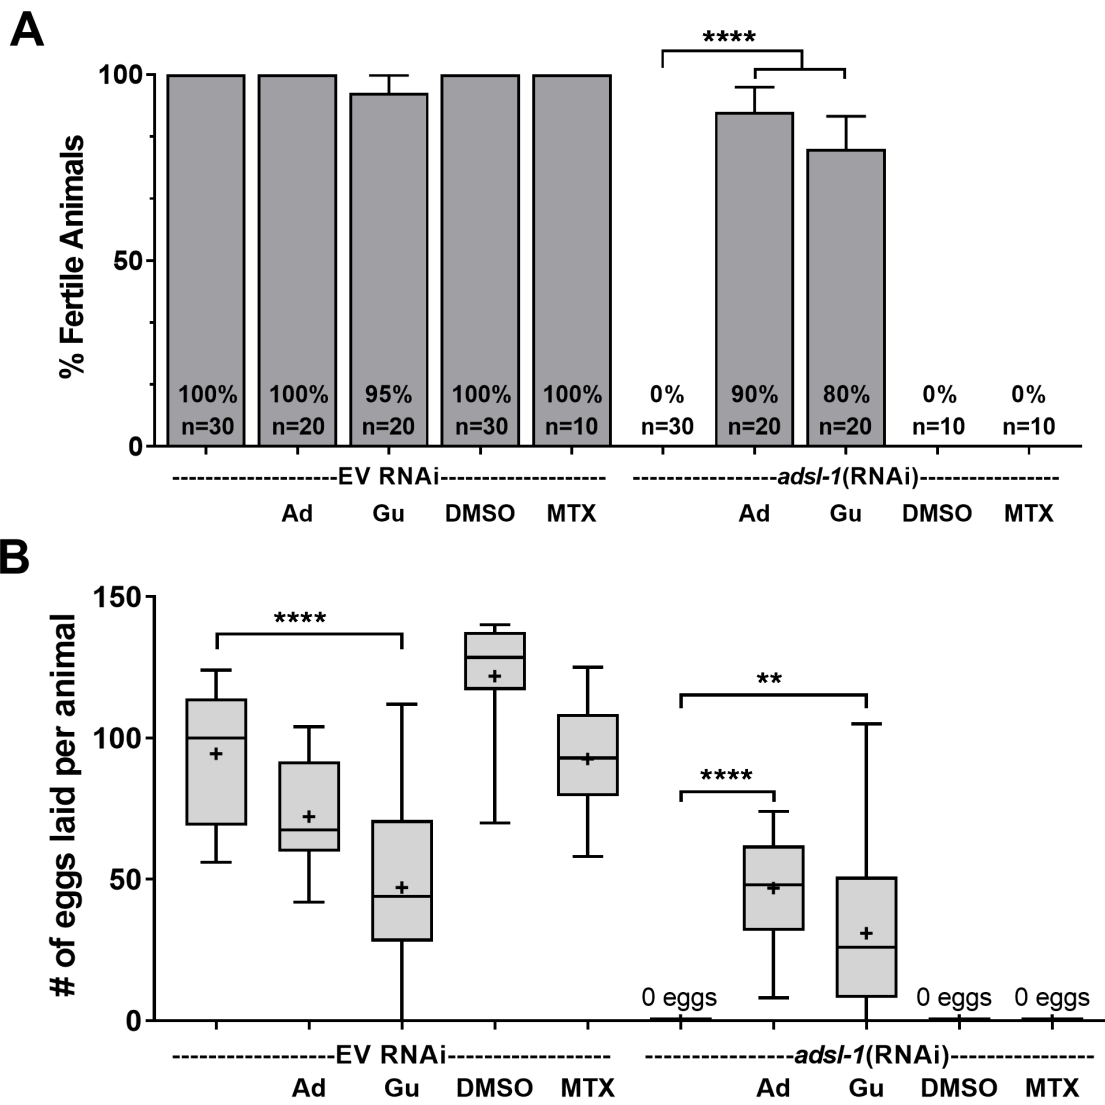

655

656 **Fig 7. Purine supplementation restores fertility and fecundity to *adsl-1*.** (A) Supplementation with 10  
 657 mM adenosine or guanosine restores fertility of *adsl-1*(RNAi) animals while supplementation with 22  $\mu$ M  
 658 methotrexate has no effect on fertility. (B) Supplementation with 10 mM adenosine or guanosine restores  
 659 fecundity for *adsl-1*(RNAi). Supplementation with 10  $\mu$ M methotrexate has no effect on fecundity in  
 660 *adsl-1*(RNAi). In A, error bars are 95% confidence interval. Box plots are as described in Figure 6. n =  
 661 10-30 animals per condition. \*, \*\*, and \*\*\*\* represent  $p < 0.05$ ,  $p < 0.01$ , and  $p < 0.0001$ , respectively.  
 662 Significance was calculated using ANOVA.

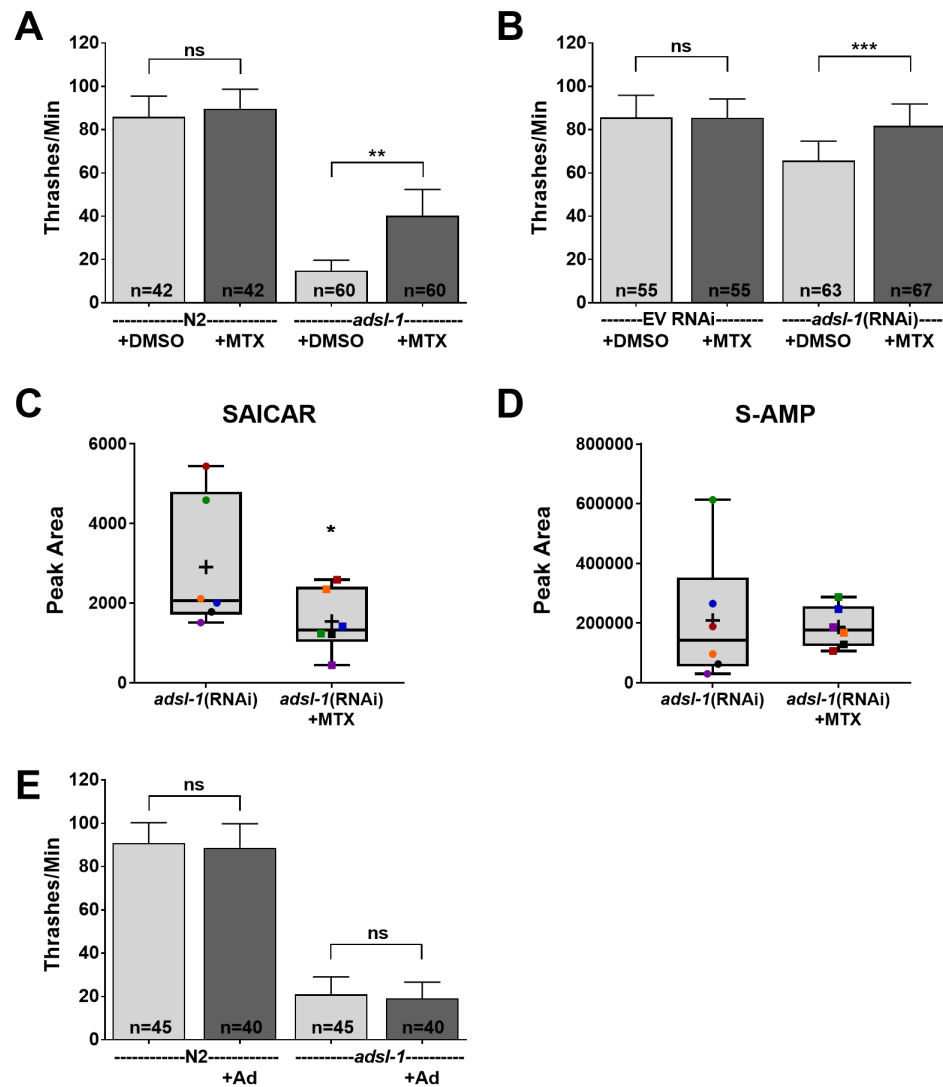

663

664 **Fig 8. Upstream inhibition of de novo purine biosynthesis improves movement of *adsl-1*. (A-B)**

665 Supplementation with 22  $\mu$ M methotrexate partially restores thrashing rate in *adsl-1* mutants (A) and

666 fully restores thrashing rate in *adsl-1*(RNAi) (B). (C) LC-MS peak areas for SAICAR decrease in *adsl-*

667 *l*(RNAi) upon supplementation with 22  $\mu$ M methotrexate. (D) LC-MS peak areas for S-AMP do not

668 change upon supplementation of *adsl-1*(RNAi) with methotrexate. (E) Supplementation with 10 mM

669 adenosine has no effect *adsl-1* mutant thrashing rate. Colored data points indicate separate biological

670 replicates of *adsl-1*(RNAi). Box plots are as described in Figure 5. Actual sample sizes indicated on each

671 bar. Error bars indicate S.D. \*, \*\*, and \*\*\* represent  $p < 0.05$ ,  $p < 0.01$ , and  $p < 0.001$ , respectively. ns is not

672 significant.

673 **Supporting information**

674

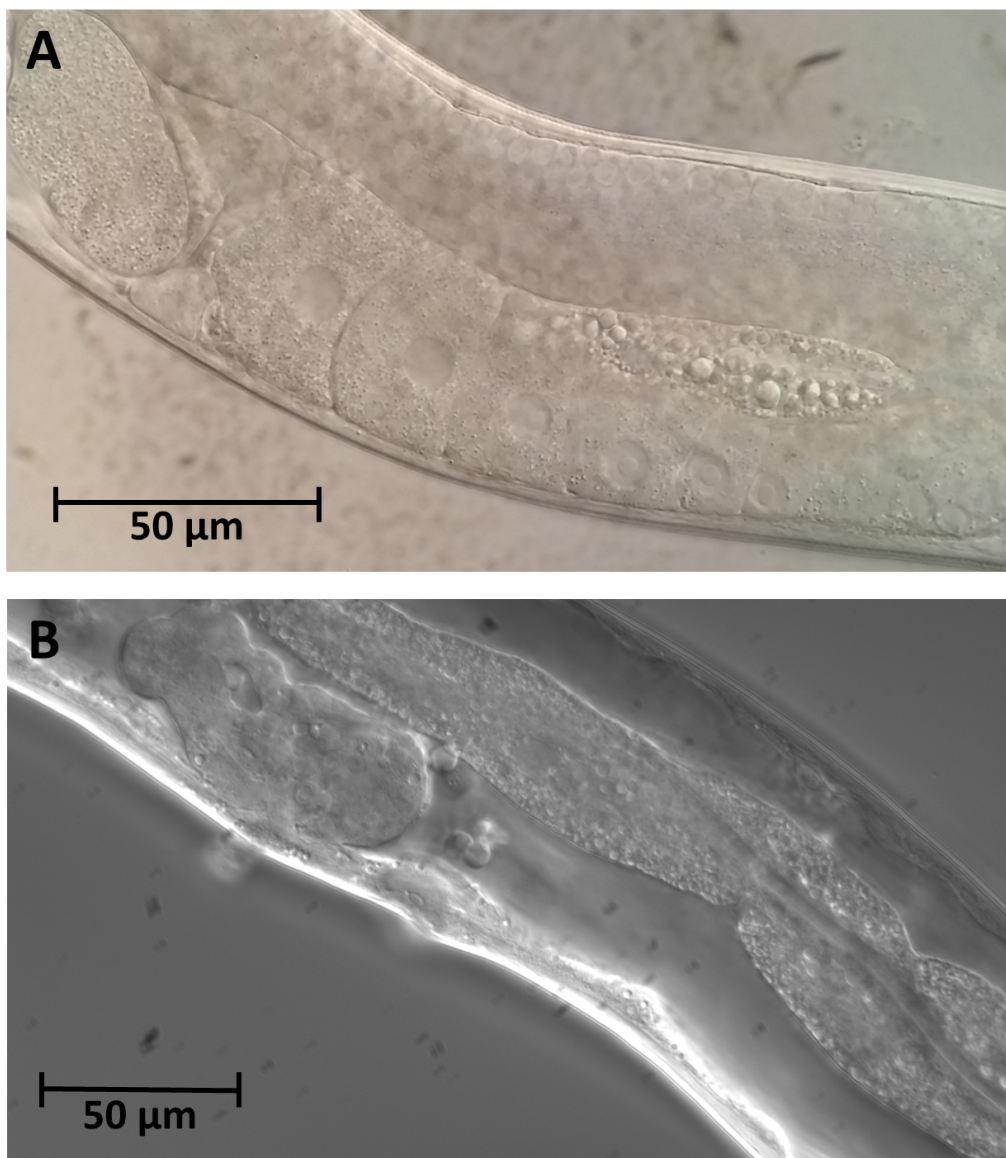

675

676 **S1 Fig. Loss of *adsl-1* severely disrupts gonad morphology.** (A) An N2 adult animal showing normal  
677 gonad and oocyte development. (B) A representative *adsl-1(tm3228)* mutant adult has degenerate gonad  
678 morphology. No oocytes are present in the mutant animal.

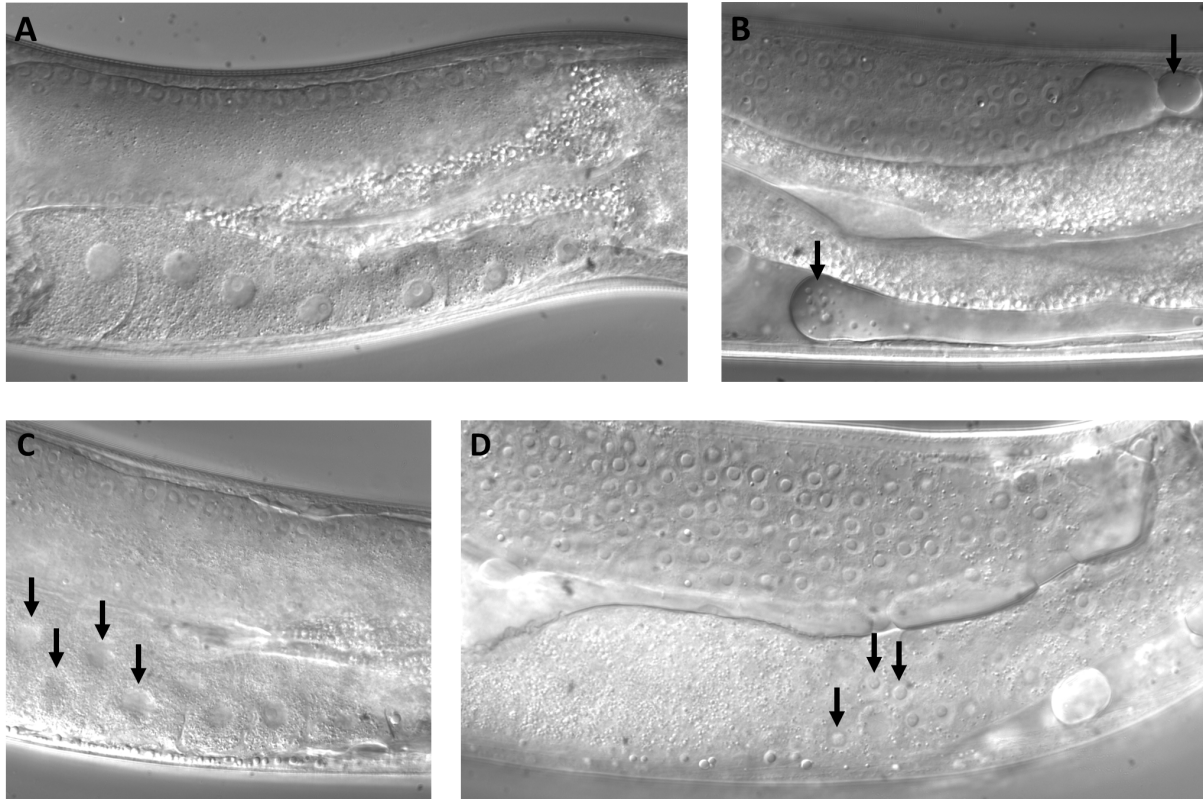

679

680 **S2 Fig. Knockdown of *adsl-1* causes defects in gonad morphology.** (A) An *eri-1* adult animal with  
681 normal gonad development. (B-D) Adult *eri-1* animals exposed to *adsl-1*(RNAi) for 24 hours display a  
682 range of gonad morphology defects. Gonad deterioration (B), double oocytes in the proximal gonad (C),  
683 and germ cells in the proximal gonad (D) were all observed under these conditions of *adsl-1* knockdown.

684
